# Supplementary material for: Hemodynamic outcomes in patients undergoing bidirectional cavopulmonary connection with additional or antegrade pulmonary blood flow: a single-centre retrospective study
Source: PeerJ. 2025 Oct 6;13:e20021. doi: 10.7717/peerj.20021 (PMC12510245; doi:10.7717/peerj.20021)
Supplement: Supplemental Information 4 [file peerj-13-20021-s004.xlsx]

## Sheet: Sheet1
Sex	datedeath	daterecentvisit	fSpO2	fFC	Arrhythmia	fThrombosis	fAVM	fCollaterals	fMAPCAs	Antiplatelet	Anticoagulant	fPatencyofshunt	fAPBF	fVentricularfunction	fAVvalveregurgitation	date1stvisit	GA	Preterm	BW	LowBW	iSpO2	Heterotaxy	Isomerism	iAVVR	iEF	ConfluencePAs	iMAPCAs	Physiology	preGlenncardiaccath	preGlennBSA	preGlennRPA	preGlennLPA	preGlennAbdominalaorta	preGlennMcGoonratio	preGlennNakataindex	preGlennmPAP	preGlennLVEDP	preGlennPVRi	preGlennMedication	dateGlenn	glennBW	preGlennSpO2	Glenntype	CPBtime	Optime	Crossclamptime	CVP	Inotrope	Pulmvasodi
Female		2022-11-22	93	0	Yes	No	No	No	No	Yes	No	No	No	No	No	2006-09-19	40	No	3600	No	68	No	No	No	No	Yes	No	Pulmonary obstruction	2006-12-20	0.65	17.61	16.03	12	2.8	686.88	26	12	3.26	No ASA	2008-01-28	16.5	71	BDG	65	140	23	12	22	0
Male		2023-08-12	89	0	No	No	No	Yes	No	No	Yes	No	No	No	No	2006-11-10	39	No	2510	No	70	Yes	No	No	No	Yes	No	Pulmonary obstruction	2007-11-30	0.32	6.1	5.8	7.92	1.48	173.84	5	10		ASA	2008-02-05	5.51	72	Bilateral BDG	117	270	0	22	14	0
Female		2023-09-12	95	0	No	No	No	Yes	No	No	Yes	No	No	No	No	2011-08-19	40	No	3120	No	91	No	No	No	No	Yes	No	Excessive pulmonary blood flow	2012-03-22	0.28	6.9	8.22	7.5	2.01	324.61	18	13	0.84	No ASA	2013-03-21	7.6	80	BDG	62	95	0	15	16	0
Male		2019-04-10	96	0	No	No	No	No	No	No	Yes	No	No	No	No	2006-11-22	38	No	2630	No	86	Yes	No	No	No	Yes	No	Pulmonary obstruction	2007-12-17	0.6	14	12	11	2.36	441.17		6		ASA	2008-08-07	9	65	Bilateral BDG	120	210	0	12	61	0
Male		2023-08-08	94	0	Yes	No	No	No	No	No	Yes	No	No	No	No	2007-10-01	40	No	2940	No	94	No	No	Yes	No	Yes	No	Excessive pulmonary blood flow	2008-05-16	0.38	7.66	8.72	8.46	1.93	278.43	41	14		No ASA	2008-11-13	8.5	79	BDG	74	230	0	7	67	0
Female		2023-08-22	94	0	No	No	No	No	No	Yes	No	No	No	No	No	2012-06-12	40	No	3155	No	87	No	No	No	No	Yes	No	Pulmonary obstruction	2012-10-11	0.33	6.79	6.52	7.46	1.78	214	16	11	2.17	No ASA	2013-11-19	8.2	78	BDG	50	75	0	15	25	0
Male		2023-07-11	92	0	No	No	No	No	No	Yes	No	Yes	No	No	Yes	2003-10-14	40	No	3150	No	84	Yes	Yes	No	No	Yes	No	Systemic obstruction	2005-11-23	0.5	8.7	8.5	9.8	1.75	232.38	14	10	1.1	No ASA	2006-05-19	11.8	64	BDG	40	270	0	9	69	0
Female		2023-07-18	99	0	No	No	No	No	No	No	Yes	No	No	No	No	2009-01-09	38	No	2730	No	95	No	No	No	No	Yes	No	Excessive pulmonary blood flow	2009-07-31	0.3	4.53	3.57	7.97	1.02	87.98	15	8	2.88	ASA	2009-08-11	5.7	60	BDG	0	240	0	18	383	48
Female		2023-03-28	96	0	No	No	No	No	No	Yes	Yes	No	No	No	No	2015-02-03	36	Yes	2790	No	92	No	No	No	No	Yes	No	Pulmonary obstruction	2016-02-18	0.357	7.3	6.75	7.4	1.9	217.47	18	8	2.95	No ASA	2016-08-15	10	73	BDG	120	195	13	1	128	0
Male		2023-08-03	86	0	No	No	No	Yes	No	Yes	No	No	No	Yes	Yes	2014-10-15	40	No	3000	No	86	No	No	No	No	Yes	No	Pulmonary obstruction	2014-03-11	0.535	7.3	6.7	10.28	1.42	141.9	13	14	0.38	ASA	2014-12-15	12.5	84	BDG	60	120	17	11	0	0
Male		2023-03-27	92	0	No	No	No	No	No	Yes	No	No	No	No	No	2000-10-16	40	No	2750	No	60	No	No	No	No	Yes	No	Pulmonary obstruction	2007-03-05	0.57	8.7	10	10	1.4	243.8	15	6	3.01	ASA	2007-10-15	12	83	BDG	166	450	0	18	19	0
Female		2023-04-18	84	0	No	No	No	Yes	No	No	Yes	No	No	No	No	2007-09-06	41	No	3160	No	70	Yes	No	No	No	Yes	No	Pulmonary obstruction	2008-09-12	0.4	8.9	12.6	9.4	2.28	472.63	17	16	0.29	ASA	2009-06-03	9.8	74	Bilateral BDG	78	180	0	22	16	0
Male		2023-07-04	88	0	No	No	Yes	Yes	No	Yes	No	No	No	No	No	2010-04-25	35	Yes	1790	Yes	93	Yes	No	No	No	Yes	No	Pulmonary obstruction	2010-11-04	0.34	10.77	9.81	8.18	2.51	496.96	21	12	1.56	No ASA	2011-03-21	7.1	80	Bilateral BDG	112	225	0	15	133	0
Female		2023-07-11	98	0	No	No	Yes	Yes	No	No	Yes	No	No	No	No	2013-09-06	39	No	3090	No	70	No	No	No	No	Yes	No	Pulmonary obstruction	2014-05-14	0.337	6.5	7	8.6	1.6	212.66	19	11	2.51	No ASA	2015-09-15	7.94	82	BDG	56	240	0	15	0	0
Female		2023-08-07	85	0	No	No	No	No	No	No	No	No	No	No	No	2016-03-11	40	No	4146	No	80	No	No	Yes	No	Yes	No	Pulmonary obstruction	2016-10-06	0.338	7.54	7.53	7.05	2.14	263.86	23	15	2.03	ASA	2017-06-13	8.7	75	BDG	84	180	11	13	45	0
Male		2023-07-11	96	0	No	No	No	No	No	Yes	No	No	No	No	Yes	2014-04-21	38	No	3260	No	88	No	No	Yes	No	Yes	No	Pulmonary obstruction	2015-03-02	0.362	10.4	8.8	7.93	2.42	402.68	15	8	3.07	ASA	2015-07-11	7.6	88	BDG	30	60	0	20	48	0
Male		2023-03-21	96	0	No	No	No	No	No	Yes	No	No	No	No	No	2010-01-04	39	No	3300	No	72	Yes	No	No	No	Yes	No	Pulmonary obstruction	2010-01-05	0.48	9.9	8.6	8.5	2.17	145.16	13	10	1.69	No ASA	2010-01-12	8.4	76	BDG	66	120	0	11	140	72
Male		2019-11-26	97	0	No	No	No	No	No	Yes	No	No	No	No	No	2007-08-07	40	No	3330	No	80	No	No	No	No	Yes	No	Pulmonary obstruction	2009-04-09	0.48	16	9.1	12.41	2	555.18	16	11	3.29	ASA	2011-05-23	12	80	BDG	91	135	0	12	46	0
Female		2013-11-01	98	0	No	Yes	No	No	No	Yes	Yes	No	No	No	#NULL!	2004-05-11	37	No	1880	Yes	80	No	No	No	No	Yes	No	Pulmonary obstruction	2007-03-08	0.52	7.1	7.4	9	1.6	157.28	16	8	2.3	ASA	2007-12-20	12.2	80	BDG	101	165	0	#NULL!	70	0
Female		2023-03-07	95	0	No	No	No	No	No	Yes	No	No	No	No	No	2007-10-20	39	No	3030	No	78	Yes	No	No	No	Yes	No	Pulmonary obstruction	2008-07-10	0.36	8.6	9.4	8.4	2.1	352.95	12	12	2.69	ASA	2008-11-24	7	80	Bilateral BDG	74	180	7	8	44	0
Female		2022-12-20	97	0	No	No	No	No	No	Yes	No	No	No	No	No	2007-02-20	40	No	3800	No	94	No	No	Yes	No	Yes	No	Systemic obstruction	2007-10-18	0.32	12	11.2	7.3	3.1	659.31	49	17	4.27	No ASA	2008-02-15	5	93	BDG	102	175	48	5	144	32
Female		2023-05-30	94	0	No	No	No	No	No	Yes	No	No	No	No	No	2009-08-30	38	No	2230	Yes	88	No	No	No	No	Yes	No	Pulmonary obstruction	2010-02-04	0.3	11.6	9.11	8.14	2.5	564.58	11	10	1.31	ASA	2010-09-30	6.45	70	BDG	114	235	0	11	328	0
Female		2023-09-12	99	0	No	No	No	Yes	No	Yes	No	No	No	No	No	2013-12-24	40	No	2760	No	75	No	No	No	No	No	No	Pulmonary obstruction	2013-09-24	0.41	8.4	8	7.9	2	270	17	7		No ASA	2014-10-24	11	74	Bilateral BDG	101	180	0	6	47	0
Female		2023-06-06	96	0	No	No	No	No	Yes	Yes	No	No	No	No	No	2008-12-16	40	No	3000	No	85	No	No	No	No	Yes	Yes	Pulmonary obstruction	2012-10-18	0.79	12.3	9.25	10.9	1.98	236.45		15		ASA	2013-03-01	23.7	76	BDG	90	210	54	12	147	0
Male		2023-08-08	92	0	No	No	No	No	Yes	No	No	No	No	No	No	2012-10-16	38	No	2690	No	77	No	No	No	No	Yes	No	Pulmonary obstruction	2013-02-28	0.33	6.73	7.76	6.77	2.14	254.76	23	13	1.56	ASA	2013-09-24	8.8	76	BDG	57	105	0	20	48	0
Male		2022-12-06	98	0	No	No	No	Yes	No	No	Yes	No	No	No	No	2010-03-02	40	No	3300	No	60	Yes	No	No	No	Yes	No	Pulmonary obstruction	2011-04-08	0.49	10	7.23	10.93	1.57	244.1	13	11	1.04	No ASA	2011-09-19	11.8	78	Bilateral BDG	61	150	0	12	116	0
Male		2023-06-27	96	0	No	No	No	No	No	Yes	No	No	No	Yes	No	2005-10-31	40	No	3000	No	56	No	No	No	No	Yes	No	Pulmonary obstruction	2008-01-09	0.35	13.6	7.2	12	1.7	531.11	18	14		ASA	2008-07-23	13	80	BDG	157	290	79	12	96	0
Male		2023-08-15	94	0	No	No	No	Yes	No	No	Yes	No	No	Yes	No	2009-05-22	39	No	3090	No	70	No	No	No	No	Yes	No	Excessive pulmonary blood flow	2010-08-19	0.37	6.9	9.48	7.1	2.3	291.83	22	16	2.09	No ASA	2010-12-02	7.6	87	BDG	139	265	6	17	89	36
Male		2023-09-08	99	0	No	No	Yes	No	No	Yes	Yes	No	No	No	No	2014-08-07	40	No	3180	No	70	Yes	No	No	No	Yes	No	Pulmonary obstruction	2018-09-10	0.405	10.15	10.04	7.15	2.8	389.21	15	10	1.32	No ASA	2018-10-26	8.06	80	BDG	58	155	0	16	72	0
Male		2011-05-20	96	0	No	No	No	No	No	Yes	No	No	No	Yes	No	2003-04-13	38	No	2800	No	80	Yes	No	No	No	Yes	No	Pulmonary obstruction	2005-02-14	0.5	10.6	11.62	10.69	2	391.49	8	7		ASA	2006-03-27	12.2	64	BDG	87	330	0	5	48	0
Female		2023-07-20	96	0	Yes	No	No	No	No	No	Yes	No	No	No	No	2011-06-24	40	No	2960	No	90	Yes	Yes	No	No	Yes	No	Pulmonary obstruction	2012-01-23	0.32	7.28	6.74	8.7	1.61	229.06	16	12	2.57	ASA	2012-03-12	6.8	79	BDG	56	160	0	18	26	0
Female		2023-10-10	87	0	No	No	No	Yes	No	Yes	Yes	No	No	Yes	No	2016-07-04	39	No	2700	No	70	Yes	No	No	No	Yes	No	Pulmonary obstruction	2017-02-02	0.3	7.59	6.84	7.37	1.96	273.3	22	12	2.94	ASA	2018-02-19	9.7	78	Bilateral BDG	126	200	0	15	44	0
Male		2023-05-30	94	0	No	Yes	No	Yes	No	No	Yes	No	No	No	No	2009-01-12	40	No	2740	No	78	No	No	No	No	Yes	No	Pulmonary obstruction	2011-01-12	0.58	17.3	14.4	11.8	2.68	688.16		15		No ASA	2013-10-18	23.5	80	BDG	109	190	0	27	69	36
Male		2022-11-22	96	0	No	No	No	No	No	Yes	No	No	No	No	No	2013-10-10	37	No	2630	No	75	No	No	No	No	Yes	No	Pulmonary obstruction	2014-05-21	0.34	6.08	8.4	7.02	2	237.32	15	10	1.02	ASA	2014-10-10	8	79	BDG	44	90	0	16	20	0
Male		2022-06-28	96	0	No	No	No	No	Yes	Yes	No	No	No	No	No	2012-10-08	40	No	3100	No	78	No	No	No	No	Yes	No	Pulmonary obstruction	2012-12-26	0.45	10.4	7.24	9.1	1.94	279.93	19	13	2.44	No ASA	2013-10-25	11	81	BDG	63	112	45	9	#NULL!	0
Female		2023-09-19	90	0	No	No	No	No	No	Yes	No	No	No	No	No	2017-04-13	38	No	2500	No	78	No	No	No	No	Yes	No	Pulmonary obstruction	2018-01-11	0.356	6.2	6.7	6.13	2	183.84	24	15	2.15	No ASA	2018-02-06	6.8	80	BDG	133	210	0	16	96	0
Male		2023-04-18	95	0	No	No	No	No	No	Yes	No	No	No	No	No	2007-11-07	39	No	3415	No	75	Yes	No	No	No	Yes	No	Pulmonary obstruction	2009-01-30	0.37	8.1	6.76	9.7	1.5	235.16	16	15	2.77	ASA	2009-05-04	8.16	72	BDG	36	120	0	16	74	0
Male		2023-09-27	95	0	Yes	No	Yes	Yes	No	No	No	No	No	No	Yes	2014-05-27	39	No	2520	No	61	Yes	Yes	No	No	Yes	No	Pulmonary obstruction	2014-04-14	0.367	7.25	7.07	8.23	1.73	224	16	13	1.18	No ASA	2014-09-05	5.9	75	Bilateral BDG	49	105	0	20	47	48
Male		2023-08-15	97	0	No	No	No	Yes	No	Yes	No	No	No	No	No	2013-06-03	39	No	4155	No	70	Yes	Yes	No	No	Yes	No	Pulmonary obstruction	2016-01-07	0.547	8.7	8.2	8.7	1.94	205.22		12		ASA	2018-11-30	16	70	Bilateral BDG	75	225	46	4	22	0
Male		2023-07-25	95	0	No	No	No	No	No	Yes	No	No	No	No	Yes	2011-01-18	40	No	2690	No	74	No	No	No	No	Yes	No	Pulmonary obstruction	2011-02-06	0.41	9.86	12.64	10.22	2.1	504.34	24	15	1.4	ASA	2011-07-04	8.79	88	BDG	79	240	0	16	46	0
Female		2015-01-07	72	1	No	No	No	No	No	No	Yes	#NULL!	#NULL!	No	#NULL!	2007-02-09					84	No	No	No	No	Yes	No	Systemic obstruction	2007-09-21	1.14	27.4	21	14	3.4	824.04	33	14	4.34	No ASA	2008-01-21	31.7	65	BDG	0	125	0	5	34	0
Male		2023-08-25	99	0	No	No	No	No	No	Yes	No	No	No	No	No	2014-12-11	40	No	3552	No	84	Yes	Yes	No	No	Yes	No	Pulmonary obstruction	2015-06-04	0.38	13.39	10.5	7.85	2	606.11	19	12	1.99	No ASA	2015-08-21	7.8	89	Bilateral BDG	93	140	19	18	21	0
Female		2023-10-03	86	0	No	Yes	No	No	No	Yes	Yes	No	No	No	No	2014-03-17	39	No	2630	No	90	Yes	Yes	Yes	No	Yes	No	Pulmonary obstruction	2014-10-01	0.352	6.25	6.8	8.04	1.62	190.33	13	10		ASA	2016-02-12	11.8	84	BDG	35	80	0	19	24	0
Male		2023-04-18	94	0	Yes	No	No	Yes	No	Yes	Yes	No	No	No	Yes	2010-01-05	38	No	3370	No	96	No	No	Yes	No	Yes	No	Excessive pulmonary blood flow	2010-07-15	0.32	6.55	7.02	6.29	2.7	217.29	18	13	10.34	No ASA	2010-09-07	6.1	62	BDG	88	120	0	17	73	22
Male		2023-01-10	98	0	No	No	No	No	No	Yes	No	No	No	No	No	2010-06-22	40	No	2980	No	70	Yes	Yes	No	No	Yes	No	Pulmonary obstruction	2010-09-09	0.34	11.35	11.61	11	2.08	647	18	17	2.1	ASA	2013-11-23	13.8	74	Bilateral BDG	77	115	0	14	24	0
Male		2023-09-25	97	0	No	No	No	No	No	Yes	No	No	No	No	No	2016-01-08	40	No	3000	No	70	Yes	Yes	No	No	Yes	No	Pulmonary obstruction	2018-05-31	0.6	11.23	7.36	8.6	2.1	167.7	15	14	0.21	No ASA	2018-06-05	12.6	78	BDG	57	180	0	14	52	0
Male		2023-08-22	88	0	No	No	No	No	No	No	Yes	No	No	No	No	2010-11-03	27	Yes	2510	No	92	No	No	No	No	Yes	No	Excessive pulmonary blood flow	2011-06-02	0.32	6	6.42	9	1.37	189.52	37	13	2.79	ASA	2012-03-08	7.73	88	BDG	74	300	0	14	47	0
Male		2023-04-11	95	0	No	Yes	Yes	No	No	Yes	No	No	No	No	No	2009-08-07	36	Yes	2140	Yes	84	No	No	No	No	Yes	No	Pulmonary obstruction	2010-01-12	0.45	7.64	10.49	10.21	1.78	292.38	16	13	2.79	ASA	2011-06-24	10.6	79	BDG	53	70	0	16	19	0
Male		2023-04-18	95	0	No	No	No	No	No	Yes	No	No	No	No	No	2005-07-03	38	No	2250	Yes	60	No	No	No	No	Yes	No	Pulmonary obstruction	2007-01-19	0.42	7.91	8.51	10.09	1.64	253.31	20	10	1.95	ASA	2007-11-02	9.7	80	Bilateral BDG	71	145	0	17	25	0
Male		2023-08-08	91	0	No	No	No	No	No	No	No	No	No	No	No	2011-03-07	38	No	2448	Yes	80	No	No	No	No	Yes	No	Pulmonary obstruction	2011-07-21	0.36	8.5	7	7	2.2	263.42	8	8		ASA	2011-12-14	7.56	77	BDG	210	75	5	21	144	0
Female		2023-06-27	96	0	No	No	No	Yes	No	Yes	No	No	No	Yes	No	2013-05-21	40	No	3620	No	85	No	No	No	No	Yes	No	Pulmonary obstruction	2013-09-05	0.39	8.9	8.3	8.3	2	300.18	8	9		No ASA	2014-06-16	10.6	84	BDG	53	125	0	18	22	0
Male		2022-09-27	96	0	No	No	No	No	No	No	Yes	No	No	No	No	2005-12-11	40	No	3200	No	50	No	No	No	No	Yes	No	Pulmonary obstruction	2008-09-17	0.41	8.09	11.04	10.31	1.76	355.35	18	15	4.64	ASA	2009-02-05	12.9	83	BDG	95	120	0	13	48	0
Female		2023-01-25	96	0	Yes	No	No	Yes	Yes	Yes	No	No	No	No	No	2010-02-09	40	No	2040	Yes	72	No	No	No	No	Yes	No	Pulmonary obstruction	2012-06-21	0.43	9.3	9.4	7.38	2.53	317.62	23	11	3.26	ASA	2012-10-19	8.2	74	BDG	107	120	0	19	191	24
Female		2023-06-27	97	0	No	No	No	Yes	No	Yes	No	No	No	No	No	2017-11-02	40	No	3720	No	84	No	No	Yes	No	Yes	No	Pulmonary obstruction	2018-09-06	0.36	6.02	5.15	6.1	1.83	136.7	12	10	2.14	ASA	2018-09-06	7.6	97	BDG	100	240	0	5	96	0
Female		2023-07-11	95	0	Yes	No	No	Yes	Yes	Yes	No	No	No	No	No	2007-01-22	40	No	3410	No	70	No	No	No	No	Yes	No	Pulmonary obstruction	2008-01-25	0.4	10.1	7.28	7.28	2.1	300.47	19	9	1.35	ASA	2008-08-01	9.3	84	BDG	110	170	11	5	118	100
Male		2013-05-10	93	0	No	No	No	No	No	Yes	No	No	No	No	No	2004-04-23	42	No	3080	No	48	No	No	No	No	Yes	No	Excessive pulmonary blood flow	2008-11-26	0.53	12.56	11.42	11.67	2.05	429	18	16	0.71	No ASA	2009-08-25	15.95	86	BDG	103	260	0	16	36	0
Female		2023-06-27	89	0	No	No	No	Yes	No	Yes	Yes	No	No	No	No	2015-05-11	39	No	3080	No	91	No	No	No	No	Yes	No	Pulmonary obstruction	2015-12-23	0.33	7.45	6.22	6.95	1.96	222.81	11	13	0.48	ASA	2016-09-09	9	78	BDG	41	90	0	21	95	0
Male		2023-09-01	93	0	Yes	No	No	No	No	No	Yes	No	No	No	Yes	2005-06-20	38	No	3160	No	86	No	No	No	No	Yes	No	Systemic obstruction	2006-03-02	0.33	9.23	12.94	6.62	3.3	609.97	18	6		No ASA	2006-11-17	8.4	85	BDG	78	180	5	7	47.5	0
Male		2023-10-17	93	0	Yes	No	No	No	No	Yes	No	No	No	Yes	No	2012-05-22	40	No	3070	No	84	No	Yes	No	No	Yes	No	Pulmonary obstruction	2012-09-05	0.34	13.34	10.93	6.56	2.22	681.6	18	14	2.43	No ASA	2012-12-21	7.62	85	Bilateral BDG	95	120	0	16	50	0
Female		2023-10-31	93	0	No	No	No	Yes	Yes	Yes	Yes	No	No	No	No	2013-05-14	40	No	2880	No	70	Yes	No	No	No	Yes	Yes	Pulmonary obstruction	2018-08-30	0.79	10.5	7.24	10.7	1.65	161.31	24	14	1.08	ASA	2018-10-26	19.5	85	BDG	126	200	0	17	102	0
Male		2023-07-11	98	0	No	No	No	Yes	Yes	Yes	No	No	No	No	No	2007-06-12	40	No	3500	No	85	No	No	Yes	No	Yes	No	Pulmonary obstruction	2007-11-07	0.6	10.1	11	13.2	1.6	290.1	16	8	2.2	ASA	2008-06-02	14.6	72	BDG	122	210	23	18	25	0
Male		2023-03-28	95	0	No	No	No	No	No	Yes	No	No	No	No	No	2009-08-29	37	No	2750	No	89	No	No	No	No	Yes	No	Systemic obstruction	2009-03-23	0.35	11.1	11.92	7.7	2.9	590.32	22	7	3.96	No ASA	2009-07-20	7.4	82	BDG	59	120	0	14	62	48
Female		2023-06-21	95	0	No	No	No	No	No	No	Yes	No	No	No	No	2011-05-04	37	No	2910	No	78	No	No	No	No	Yes	No	Pulmonary obstruction	2012-01-12	0.35	6.45	8.93	9.33	1.64	273.43	19	12		ASA	2012-06-01	7.9	77	BDG	103	190	0	14	162	0
Female		2022-12-13	96	0	No	No	No	Yes	No	Yes	No	No	No	Yes	No	2011-06-14			3000	No	97	No	No	No	No	Yes	No	Pulmonary obstruction	2011-12-01	0.35	11.3	9.6	6.8	3	496.2	17	15	0.57	No ASA	2012-02-13	7.1	70	BDG	61	150	8	14	45	0
Male		2023-01-17	96	0	No	No	Yes	No	No	Yes	No	No	No	Yes	No	2013-03-21	37	No	2320	Yes	95	No	No	No	No	Yes	No	Systemic obstruction	2013-10-21	0.31	5.1	7	7.3	1.7	190.89	19	12	1.13	No ASA	2014-02-04	6.45	86	BDG	51	120	0	18	#NULL!	0
Female	2013-06-12	2013-06-12	80	0	No	No	No	No	Yes	No	Yes	No	No	No	No	2003-07-21	40	No	2800	No	90	Yes	No	No	No	Yes	No	Pulmonary obstruction	2007-06-15	0.6	9	15.9	11.2	2.22	451.56	14	7	1.73	ASA	2008-08-26	13.2	82	BDG	104	215	0	8	16	0
Male		2023-06-13	93	0	No	No	No	No	No	Yes	No	No	No	Yes	No	2015-03-09	40	No	3000	No	73	Yes	No	No	No	Yes	No	Pulmonary obstruction	2015-03-26	0.429	10.57	10.6	8.63	2.45	395.72	17	12	2.12	No ASA	2015-10-03	11	86	BDG	55	105	0	13	#NULL!	0
Male	2022-11-19	2022-11-19	93	0	No	Yes	No	Yes	Yes	Yes	No	No	No	Yes	No	2006-04-07	40	No	3010	No	50	Yes	No	No	No	Yes	No	Pulmonary obstruction	2007-03-26	0.46	8.46	5.9	8.52	1.68	181.63	14	10	1.33	ASA	2007-05-24	9.5	85	Bilateral BDG	70	300	0	19	22	0
Male		2023-08-04	97	0	No	No	No	No	Yes	No	Yes	No	No	No	No	2006-11-21	38	No	2350	Yes	60	No	No	No	No	Yes	No	Pulmonary obstruction	2008-02-06	0.41	6.55	7.15	8.79	1.55	178.43	20	8	4.04	ASA	2008-05-02	9	80	BDG	97	120	12	14	46	36
Male		2023-10-16	81	0	No	Yes	No	No	No	No	Yes	No	No	No	Yes	2016-01-12	40	No	2700	No	85	Yes	Yes	No	No	Yes	No	Pulmonary obstruction	2016-08-11	0.36	9.85	10.79	6.8	2.99	471	19	14	1.83	No ASA	2016-10-10	8.65	88	BDG	73	160	0	15	41	0
Male		2023-05-01	96	0	Yes	No	No	No	No	Yes	No	No	No	Yes	No	2009-09-16	39	No	3340	No	70	No	No	No	No	Yes	No	Pulmonary obstruction	2011-01-17	0.37	8.64	8.41	8.61	1.98	317.16	18	11	3.26	ASA	2011-04-04	6.7	38	BDG	92	135	36	17	159	72
Female		2023-07-18	82	0	Yes	No	No	No	No	No	Yes	No	No	No	Yes	2004-03-22	40	No	2900	No	89	Yes	No	No	No	Yes	No	Systemic obstruction	2008-12-24	0.69	11.5	13.6	9.8	2.6	362.79	20	10	4.27	No ASA	2009-07-02	16.7	79	BDG	50	100	0	18	19	0
Male		2023-09-19	96	0	No	No	No	Yes	No	No	Yes	No	No	No	No	2014-04-01	40	No	3330	No	66	Yes	No	No	No	Yes	No	Pulmonary obstruction	2014-05-06	0.36	9.6	7.8	8.5	2	324.39	13	16	1.23	No ASA	2014-12-22	7	80	Bilateral BDG	90	195	0	19	48	0
Female	2019-04-19	2019-04-19	80	0	No	Yes	No	No	No	Yes	Yes	No	No	No	#NULL!	2009-08-07	38	No	2650	No	80	No	No	No	No	Yes	No	Pulmonary obstruction	2010-02-19	0.35	8.5	7.6	8.3	1.93	291.2		24	3.34	No ASA	2010-09-08	7.8	75	BDG	59	180	5	17	48	0
Female		2023-06-16	78	0	No	No	No	Yes	No	No	No	No	No	Yes	Yes	2012-11-19	38	No	3820	No	92	Yes	Yes	Yes	No	Yes	No	Systemic obstruction	2015-10-22	0.542	14.57	11.05	9.58	2.67	484.55	22	15	2.88	No ASA	2016-09-23	12.9	79	BDG	93	180	43	16	353	0
Female		2023-04-11	96	0	Yes	No	No	No	No	Yes	No	No	No	No	No	2005-08-25			3150	No	78	No	No	No	No	Yes	No	Pulmonary obstruction	2006-01-20	0.37	8	11	7.5	2.5	388.09	37	9		No ASA	2006-02-09	7.2	83	BDG	41	165	0	#NULL!	#NULL!	#NULL!
Female		2023-05-09	96	0	Yes	No	No	No	No	Yes	Yes	No	No	No	No	2015-11-11	40	No	2720	No	76	Yes	Yes	Yes	No	Yes	No	Pulmonary obstruction	2016-02-15	0.55	12.3	7.7	7.9	2.5	301.03	15	12	0.75	No ASA	2016-10-04	12.4	79	Bilateral BDG	145	270	0	11	13	0
Female		2023-08-22	95	0	No	No	Yes	Yes	No	No	No	Yes	No	Yes	No	2014-05-14	38	No	2720	No	58	No	No	No	No	Yes	No	Pulmonary obstruction	2014-04-16	0	12	7			481				No ASA	2014-05-27	7.6	69	BDG	104	180	8	12	75	0
Male		2013-11-17	70	0	No	No	No	No	No	Yes	No	No	No	No	No	2011-03-15	39	No	3600	No	83	Yes	Yes	No	No	Yes	No	Pulmonary obstruction	2011-04-07	0.38	10.8	10.5	7.5	2.8	463.59	20	9	3.5	No ASA	2012-01-28	10	74	Bilateral BDG	89	153	0	18	246	96
Female		2017-01-13	53	0	No	No	No	Yes	No	Yes	No	No	No	No	No	1997-03-17	40	No	3100	No	83	No	No	No	No	Yes	No	Pulmonary obstruction	1999-05-11	0	16	8	15	2	537		10		No ASA	2002-07-16	15	83	BDG	89	90	11	#NULL!	#NULL!	#NULL!
Male		2016-07-08	83	0	No	Yes	No	Yes	No	Yes	Yes	No	No	Yes	No	1992-12-15	40	No			70	No	No	No	No	Yes	No	Pulmonary obstruction	2000-01-19	0.82	12	11			253.82	16	13	0.42	No ASA	2001-06-13	21.4	88	BDG	155	#NULL!	69	#NULL!	#NULL!	#NULL!
Male	2021-08-05	2021-08-05	77	0	Yes	No	No	Yes	Yes	No	Yes	No	No	No	No	1997-11-11	40	No	3300	No	68	Yes	No	No	No	Yes	No	Pulmonary obstruction	2007-10-12	0.96	14.7	12	15.9	1.68	294.6		15	1.21	No ASA	2010-01-28	36.3	87	BDG	159	360	0	15	17	0
Female		2023-11-08	79	0	No	No	No	No	No	No	Yes	No	No	Yes	No	1998-08-19	40	No	2850	No	70	No	No	No	No	Yes	No	Pulmonary obstruction	2004-04-19	0.69	27	6.2			873.54	12	10		ASA	2006-06-30	17.5	86	Bilateral BDG	201	339	37	15	67	0
Male		2015-07-08	87	0	No	No	No	No	No	Yes	No	No	No	No	No	2001-01-30	40	No	2750	No	70	Yes	No	No	No	No	No	Pulmonary obstruction	2011-02-03	1.22	15.4	14.6	17.6	1.7	289.44	14	10	0.73	ASA	2011-07-22	38.3	85	Bilateral BDG	105	180	0	15	9	0
Male		2023-08-15	79	0	No	No	Yes	No	Yes	Yes	No	No	No	No	No	2005-12-17	33	Yes	2220	Yes	77	No	No	No	No	Yes	No	Pulmonary obstruction	2012-05-10	0.84	10.74	8.44	9.3	2.06	174.55	18	16	1.06	ASA	2012-10-17	21.5	97	BDG	204	360	0	18	62	0
Female		2023-11-02	81	0	No	Yes	No	No	No	No	No	No	No	No	No	2006-03-29	40	No	3020	No	70	Yes	No	No	No	Yes	No	Pulmonary obstruction	2012-10-29	0.66	7.08	12.17	9.07	2.12	236.4	19	13	1.45	ASA	2013-08-16	15.8	82	BDG	138	210	0	17	70	0
Female		2023-02-09	80	0	No	No	Yes	No	No	Yes	Yes	No	Yes	Yes	No	2006-11-16					82	No	No	No	No	Yes	No	Pulmonary obstruction	2007-04-06	1.5	18.1	19.1	17.1	2.1	364.98	18	14	2.51	No ASA	2008-02-01	53.8	85	BDG	0	150	0	11	#NULL!	#NULL!
Male		2023-07-25	77	0	Yes	Yes	No	No	No	No	Yes	No	No	Yes	No	2007-08-18	38	No	3320	No	75	Yes	No	No	No	Yes	No	Systemic obstruction	2008-11-27	0.44	10.7	10.4	11.05	1.91	397.43	13	9	1.56	ASA	2010-04-27	13	83	#NULL!	61	240	0	15	37	0
Female	2011-03-23	2011-03-23	83	0	No	No	No	No	No	No	No	No	No	Yes	No	2007-01-22	37	No	2560	No	88	No	No	No	No	Yes	No	Pulmonary obstruction	2008-01-16	0.32	6.1	6.1	6.3	1.9	184.74	20	13		No ASA	2008-02-29	7.8	71	BDG	196	55	59	5	117	120
Male	2022-11-07	2022-11-07	77	0	No	Yes	No	Yes	No	No	Yes	Yes	No	No	No	2007-02-07	40	No	3700	No	80	No	No	No	No	Yes	No	Pulmonary obstruction	2009-07-09	0.56	9	9	11.5	1.68	227.2	26	9	6.17	ASA	2010-11-17	15	73	BDG	127	270	0	16	84	0
Male	2021-12-21	2021-12-21	74	0	Yes	No	No	No	Yes	Yes	No	No	No	No	No	2007-03-07	40	No	2680	No	73	Yes	Yes	No	No	Yes	No	Pulmonary obstruction	2008-01-18	0.22	5.9	9.5	10	1.5	446.67	22	8	2.47	No ASA	2008-03-13	5.93	85	BDG	157	300	0	17	360	24
Male		2023-11-08	80	0	Yes	No	No	Yes	Yes	No	Yes	Yes	No	Yes	No	2008-01-16	40	No	3100	No	83	No	No	Yes	No	Yes	No	Pulmonary obstruction	2008-06-23	0.55	12.54	12.6	10.02	2.4	451.98	19	16		ASA	2008-12-26	12.3	82	BDG	89	130	18	9	12	48
Male		2023-05-29	67	1	Yes	No	No	Yes	No	Yes	No	No	No	No	No	2009-12-17	37	No	2930	No	91	Yes	Yes	Yes	No	Yes	No	Pulmonary obstruction	2010-09-09	0.34	9.05	11.53	8.62	2.38	496.29	19	14	0.86	No ASA	2011-01-19	8.3	85	Bilateral BDG	88	180	0	13	68	0
Male		2023-10-24	75	0	No	No	Yes	Yes	No	Yes	No	No	No	No	Yes	2013-03-08	36	Yes	3480	No	93	Yes	Yes	Yes	No	Yes	No	Systemic obstruction	2013-09-05	0.28	11.11	9.63	11.6	1.78	607.81	16	12	0.69	No ASA	2014-04-29	8.1	82	Bilateral BDG	111	240	0	29	104	24
Male		2023-07-11	78	0	No	No	No	No	No	Yes	No	No	No	No	No	2014-02-14	35	Yes	1860	Yes	80	Yes	Yes	No	No	Yes	No	Systemic obstruction	2014-08-13	0.26	3.7	4.6	5.9	1.4	101.04		9		ASA	2014-09-09	4.75	75	Bilateral BDG	85	190	53	18	27	0
Male		2023-07-04	96	0	Yes	No	No	No	No	Yes	No	No	No	Yes	Yes	2014-03-31	39	No	3260	No	86	No	No	Yes	No	Yes	No	Systemic obstruction	2014-09-11	0.242	7.07	8.22	6.6	2.3	376.78	18	6	1.44	No ASA	2015-03-06	5.1	75	Bilateral BDG	143	265	48	15	1344	84
Female	2012-11-20	2012-11-20	79	1	No	No	No	No	No	Yes	No	No	No	No	Yes	2009-03-30	40	No	3380	No	81	No	Yes	No	No	Yes	No	Pulmonary obstruction	2009-05-07	0.36	9.3	12.7	9	2.34	538.89	20	14	1.11	No ASA	2009-08-07	7.5	82	Bilateral BDG	116	180	28	9	42	0
Male		2023-10-03	85	0	No	No	No	No	No	Yes	Yes	No	No	No	No	2000-06-07	37	No	2850	No	91	No	No	No	No	Yes	No	Excessive pulmonary blood flow	2010-01-13	0.2	9.18	7.87	10.09	1.68	576.28	26	13	4.71	ASA	2010-01-26	5.2	79	Bilateral BDG	160	270	46	19	244	84
Male	2018-06-15	2018-06-15	81	1	Yes	No	No	No	Yes	Yes	No	No	No	No	Yes	2010-08-09	35	Yes	1950	Yes	67	No	No	No	No	Yes	No	Systemic obstruction	2011-01-24	0.38	7.24	6.1	7.8	1.71	187.39	27	17	2.86	No ASA	2011-06-06	8.1	96	BDG	53	110	13	2	500	48
Female	2018-01-27	2018-01-27	80	0	No	No	No	No	No	Yes	No	No	No	No	Yes	2010-11-16	40	No	2730	No	92	Yes	Yes	Yes	No	Yes	No	Systemic obstruction	2011-04-07	0.31	8.41	5.4	5.4	2.5	254.78	33	8	4.49	ASA	2011-09-22	7.4	83	BDG	130	330	27	12	63	48
Female		2019-02-22	68	0	No	No	No	Yes	No	Yes	No	No	No	No	No	2011-03-14	40	No	2760	No	86	No	No	Yes	No	Yes	No	Pulmonary obstruction	2011-03-17	0.34	6.08	7.47	6.34	2.3	214.29	14	17	1.3	No ASA	2011-03-28	6.6	80	BDG	98	390	7	13	93	16
Male		2023-05-10	73	0	No	No	No	Yes	No	Yes	No	No	No	No	No	2011-03-24	40	No	2675	No	70	No	No	No	No	Yes	No	Pulmonary obstruction	2012-04-12	0.39	9.21	6.56	9	1.75	254.48	14	11	2.05	ASA	2012-07-10	9.4	71	BDG	53	90	0	13	22	0
Male		2023-09-11	80	0	No	No	No	Yes	Yes	Yes	No	No	No	No	No	2012-01-02	39	No	2820	No	62	No	No	No	No	Yes	No	Pulmonary obstruction	2012-09-13	0.39	8.27	8.61	8.73	1.93	285.26	15	13	1.48	ASA	2012-12-18	8.8	79	BDG	54	135	0	20	45	0
Male		2015-03-17	80	0	No	No	No	Yes	No	No	Yes	No	No	No	Yes	2012-03-14	32	Yes	2590	No	86	Yes	Yes	No	No	Yes	No	Systemic obstruction	2012-03-15	0.59	8.4	10.8	9.6	2	249.77	16	16	0.89	No ASA	2012-06-16	13.8	77	BDG	75	195	0	18	141	0
Male		2023-09-05	76	0	No	No	No	No	No	Yes	No	Yes	No	No	No	2013-08-14	40	No	2760	No	60	No	No	No	No	Yes	No	Pulmonary obstruction	2016-05-04	0.59	8.3	7.7	10.14	2	171.13	20	15		ASA	2017-09-22	15.9	81	BDG	239	400	79	17	73	80
Female		2023-09-26	64	0	Yes	No	No	Yes	No	No	Yes	No	No	Yes	No	2014-03-18	38	No	2885	No	80	Yes	No	No	No	Yes	No	Pulmonary obstruction	2014-06-09	0.416	11.78	11.39	6.26	3.7	506.92	19	18	1.31	No ASA	2015-06-23	10	79	Bilateral BDG	99	175	0	21	23	0
Female		2023-08-16	75	0	Yes	No	No	Yes	No	Yes	No	No	No	No	No	2014-03-28	40	No	2380	Yes	67	Yes	Yes	No	No	Yes	No	Pulmonary obstruction	2014-05-15	0.35	6	8.24	6.54	2.1	233.15	21	18	1.51	No ASA	2014-11-25	8.2	75	Bilateral BDG	158	270	0	21	415	135
Male		2023-05-11	77	0	No	No	No	No	No	Yes	No	No	No	No	No	2014-10-22	38	No	2600	No	93	Yes	Yes	Yes	No	Yes	No	Pulmonary obstruction	2015-05-21	0.39	7.87	9.17	7.81	2.18	290.64	17	10	1.41	ASA	2015-10-13	8	85	Bilateral BDG	81	195	0	21	49	0
Male		2023-08-08	83	0	No	Yes	No	No	No	Yes	No	No	No	No	No	2015-04-25	40	No	2390	Yes	80	No	No	No	No	Yes	No	Pulmonary obstruction	2015-11-19	0.27	7.36	6.92	7.8	1.83	297.54	23	15	1.59	ASA	2016-03-11	5.6	75	BDG	63	120	0	14	146	0
Female		2023-05-09	75	0	No	No	No	No	No	Yes	No	No	No	Yes	No	2015-07-21	40	No	2975	No	70	Yes	Yes	No	No	Yes	No	Pulmonary obstruction	2015-09-07	0	13	10	9	2	608		12		ASA	2015-10-12	7	70	Bilateral BDG	275	450	22	19	93	0
Male		2023-08-23	75	0	No	No	No	Yes	No	No	Yes	No	No	Yes	No	2015-10-31	39	No	3310	No	86	No	No	No	No	Yes	No	Pulmonary obstruction	2016-07-06	0.383	8.5	10.6	8.2	2	378.57	12	10	0.14	No ASA	2017-05-23	12	80	Bilateral BDG	120	245	0	14	74	0
Female		2023-03-21	71	0	No	No	No	Yes	No	Yes	No	No	No	No	No	2016-01-31	33	Yes	2120	Yes	74	No	No	No	No	Yes	No	Pulmonary obstruction	2016-09-21	0.318	9.73	5.96	7.97	1.97	321.56	22	14	4.24	ASA	2017-02-28	7.2	80	BDG	74	185	0	15	69	60
Male		2023-06-13	80	0	No	Yes	No	Yes	No	Yes	No	Yes	No	No	No	2016-03-01	39	No	2920	No	80	Yes	No	No	No	Yes	No	Pulmonary obstruction	2017-02-08	0.205	8.76	8.62	8.15	1.75	407.85	18	12	2.85	No ASA	2017-05-14	8.4	92	Bilateral BDG	137	240	0	0	19	336
Female		2023-06-27	88	0	Yes	No	No	No	No	Yes	No	No	No	No	No	2016-06-07	38	No	2535	No	70	No	No	No	No	Yes	No	Pulmonary obstruction	2016-05-03	0.26	7.2	7.1	6.3	2.2	313.49	12	10	0.6	No ASA	2016-10-10	5.85	87	BDG	67	130	0	26	122	13
Male		2023-08-22	82	0	Yes	No	No	No	No	Yes	No	No	No	No	Yes	2016-09-25	39	No	2790	No	80	Yes	Yes	No	No	Yes	No	Pulmonary obstruction	2017-10-19	0.42	10	5.95	9.87	1.61	252.11	17	11	2.68	ASA	2018-01-22	9.4	86	BDG	160	310	0	#NULL!	122	0
Female		2023-03-28	76	0	No	No	No	No	Yes	Yes	No	No	No	No	No	2016-11-15	39	No	3610	No	68	No	No	No	No	Yes	No	Pulmonary obstruction	2017-05-11	0.34	6.84	5.58	6.68	1.86	180	22	10	3.81	ASA	2018-01-04	9.4	79	BDG	79	185	0	18	25	0
Male		2023-05-30	82	0	No	No	No	Yes	Yes	Yes	No	No	No	No	Yes	2017-01-15	40	No	3000	No	78	Yes	Yes	No	No	Yes	No	Pulmonary obstruction	2017-08-10	0.34	6.41	8.2	7	2	250.24	20	7	1.82	No ASA	2017-12-19	8.2	85	Bilateral BDG	189	390	36	19	210	1
Male		2023-06-06	83	0	No	No	No	No	No	Yes	No	No	No	No	No	2017-03-02	38	No	2900	No	80	Yes	Yes	No	No	Yes	No	Pulmonary obstruction	2018-03-22	0.39	11	10	8	2.6	429.56	19	12	2.49	ASA	2018-05-01	8.3	84	Bilateral BDG	114	290	0	18	45	0
Female		2023-09-19	74	0	No	No	No	Yes	No	Yes	No	No	No	No	No	2017-06-06	40	No	3260	No	88	Yes	Yes	No	No	Yes	No	Pulmonary obstruction	2017-11-29	0.32	9.6	11	6.6	3.19	550.79	28	12	2.79	No ASA	2018-02-12	6.8	84	BDG	53	130	0	13	140	0
Male		2023-08-22	87	0	No	No	No	Yes	No	Yes	No	No	No	No	No	2017-07-31	40	No	3340	No	64	No	No	No	No	Yes	No	Pulmonary obstruction	2017-10-11	0.36	7.3	7.9	7.5	1.97	252.42	20	14	1.2	ASA	2018-02-27	8.1	75	BDG	116	220	0	19	21	0
Male		2023-11-14	84	0	No	No	No	No	No	Yes	No	No	No	No	No	2017-09-19	40	No	2550	No	85	Yes	No	No	No	Yes	No	Pulmonary obstruction	2019-02-18	0.431	9.2	7.7	7.6	2.2	262.28	15	8	3.67	ASA	2019-05-24	9.7	90	Bilateral BDG	86	160	0	16	44	0
Male		2023-08-23	83	0	No	No	No	Yes	Yes	Yes	No	No	No	No	Yes	2018-09-07	40	No	2510	No	72	Yes	No	No	No	Yes	No	Pulmonary obstruction	2018-10-31	0.56	10.6	12.4	9.8	2.2	372.11	23	18	1.96	No ASA	2019-09-05	13	65	BDG	140	240	13	13	45	48
Female		2023-10-03	75	0	Yes	Yes	No	Yes	Yes	Yes	No	Yes	No	No	Yes	2021-03-14	38	No	2850	No	77	Yes	Yes	No	No	Yes	No	Pulmonary obstruction	2021-09-16	0.328	4.6	2.9	6.5	1.1	70.8		10		ASA	2021-09-17	7.22	76	Bilateral BDG	188	265	0	17	165	63
Male		2023-07-18	91	0	No	No	No	No	No	Yes	Yes	No	Yes	No	Yes	2017-05-17	37	No	2380	Yes	80	Yes	No	No	No	Yes	No	Pulmonary obstruction	2017-05-22	0.212	5.62	7.32	4.18	3	315.52	20	16		No ASA	2017-11-05	6.47	80	Bilateral BDG	111	210	66	13	23	0
Female		2023-04-04	89	0	No	No	No	No	No	Yes	No	No	No	No	No	2013-01-15	37	No	2700	No	51	No	No	No	No	Yes	No	Pulmonary obstruction	2013-06-13	0.34	6.7	5.8	8.83	1.42	178.7		10	2.96	No ASA	2013-06-22	6.6	61	BDG	30	90	0	14	93	0
Male		2023-08-08	95	0	No	No	No	No	No	No	Yes	No	No	Yes	No	2002-10-21	40	No	2600	No	80	No	No	No	No	Yes	No	Pulmonary obstruction	2005-08-18	0.52	13	13.9	8.97	3	549.7	12	8		ASA	2008-09-11	12.8	78	Bilateral BDG	123	220	0	7	17	0
Female		2023-04-25	94	0	No	No	No	No	No	Yes	No	No	No	Yes	Yes	2010-02-12	40	No	3150	No	72	No	No	Yes	No	Yes	No	Pulmonary obstruction	2010-05-31	0.49	12	9.4	9	2.3	369.52	13	11	1.34	No ASA	2011-01-31	11.5	70	BDG	0	70	0	16	0	0
Female		2023-06-27	96	0	No	No	No	Yes	Yes	Yes	No	No	No	No	No	2017-10-31	38	No	2880	No	100	No	No	No	No	Yes	Yes	Pulmonary obstruction	2018-03-19	0.28	9.9	3.4	5.5	2.4	308.44		10		No ASA	2018-03-27	5.95	71	BDG	65	145	0	16	42	0
Male		2023-10-10	95	0	Yes	No	No	Yes	No	No	Yes	No	No	No	No	2013-06-03	37	No	2470	Yes	88	Yes	Yes	Yes	No	Yes	No	Pulmonary obstruction	2015-05-28	0.514	18.16	9.56	9.51	2.7	643.57	17	12	2.05	ASA	2016-01-22	12.5	84	BDG	61	115	0	17	32	80
Female		2019-07-31	93	0	No	No	No	Yes	No	Yes	No	No	No	Yes	No	2013-04-09	39	No	3400	No	89	Yes	Yes	Yes	No	Yes	No	Pulmonary obstruction	2015-07-27	0.513	13.3	9.3	11.5	1.97	403.23		13	3.62	No ASA	2015-07-27	11.1	80	BDG	43	135	0	18	40	0
Female		2023-06-27	96	0	No	No	No	Yes	Yes	Yes	No	No	No	No	No	2006-10-19	40	No	3250	No	80	No	No	No	No	Yes	No	Pulmonary obstruction	2007-01-26	0.32	5.72	6.25	5.41	2.21	108.42	21	3	2.18	ASA	2007-04-20	6.55	71	Bilateral BDG	97	170	15	15	69	0
Male		2022-09-06	100	0	No	No	No	Yes	No	Yes	No	No	No	No	No	2009-01-31	37	No	2270	Yes	70	No	No	No	No	Yes	No	Pulmonary obstruction	2010-06-14	0.4	7.96	11.04	8.19	2.3	256.11	22	15	1.11	ASA	2010-11-26	9.6	70	BDG	41	75	0	14	93	0
Male	2019-05-21	2019-05-21	88	0	No	Yes	No	Yes	No	Yes	No	No	Yes	No	No	2010-11-25	40	No	3000	No	80	No	Yes	No	No	Yes	No	Pulmonary obstruction	2011-01-31	0.54	15.5	14.2	8.57	3.46	642.96	16	12	1.05	No ASA	2011-03-07	12.9	78	BDG	60	140	0	20	75	0
Female		2022-11-21	98	0	Yes	No	No	No	No	Yes	No	No	No	No	No	2009-03-23	40	No	3140	No	71	Yes	Yes	No	No	Yes	No	Pulmonary obstruction	2009-07-16	0.39	8.77	8.84	8.9	1.95	154.08	17	9	2.13	No ASA	2010-04-30	9	83	BDG	28	160	0	8	69	0
Female		2020-12-16	95	0	No	No	No	No	No	Yes	Yes	No	Yes	No	No	2011-05-11	40	No	2440	Yes	80	No	No	No	No	Yes	No	Pulmonary obstruction	2012-04-26	0.42	7.1	9.67			271.69		12		No ASA	2012-06-18	8.3	75	BDG	67	160	8	15	73	0
Male	2009-12-31	2009-12-31	85	0	Yes	No	No	Yes	No	Yes	No	No	No	Yes	No	2002-04-05	40	No	3200	No	80	Yes	No	No	No	Yes	No	Pulmonary obstruction	2005-02-04	0.54	11.9	14.5	9.2	2.8	507.9	11	8		No ASA	2005-10-25	12.2	70	Bilateral BDG	70	265	66	16	86	0
Male		2023-08-08	96	0	No	No	No	No	No	Yes	No	No	No	No	No	2009-06-24	40	No	3030	No	90	No	No	No	No	Yes	No	Pulmonary obstruction	2010-01-22	0.36	9.1	9.5	8	2.3	145.92	16	10	2.16	ASA	2010-05-24	10	80	BDG	0	75	0	14	20	0
Male		2023-08-09	95	0	Yes	No	No	No	No	Yes	No	No	No	No	No	2009-10-02	40	No	3550	No	92	No	No	No	No	Yes	No	Pulmonary obstruction	2009-09-28	0.58	13.78	9.52	12	1.8	379.86	13	14	2.6	No ASA	2010-12-13	14.5	79	BDG	27	75	0	10	48	0
Male		2023-03-24	85	0	No	No	No	No	No	Yes	Yes	No	No	No	No	2012-12-25	38	No	3120	No	89	No	No	No	No	Yes	No	Pulmonary obstruction	2013-07-25	0.27	14.7	9.51	10.31	2.3	687.6	22	9	2.73	No ASA	2013-11-11	7.6	84	Bilateral BDG	108	250	0	25	87	48
Male		2023-04-18	98	0	No	No	No	No	No	No	Yes	Yes	No	No	No	2011-02-08			3150	No	86	No	No	No	No	Yes	No	Systemic obstruction	2011-07-14	0.4	9	6	15	1.66	230.16	17	8	2.03	No ASA	2012-01-23	10.5	79	BDG	114	265	9	18	121	0
Male		2023-05-09	96	0	No	No	No	No	No	Yes	No	No	Yes	No	No	2010-11-30	40	No	3650	No	84	No	No	No	No	Yes	No	Pulmonary obstruction	2011-04-28	0.55	7.32	7.03	6.7	2.1	147.01	17	12	2.47	No ASA	2011-09-19	12.5	84	BDG	129	210	34	24	63	0
Male		2023-08-22	85	0	No	No	No	Yes	No	Yes	No	No	Yes	Yes	No	2014-12-30	40	No	3420	No	70	Yes	Yes	No	No	Yes	No	Pulmonary obstruction	2015-01-21	0.41	6	5	7	1.6	116.27				No ASA	2015-01-27	9.3	71	BDG	93	180	0	18	124	24
Male		2023-10-06	91	0	No	No	No	No	No	Yes	No	No	Yes	No	No	2005-08-16	40	No	3370	No	90	No	No	No	No	Yes	No	Pulmonary obstruction	2006-01-06	0.35	6.5	5.6	7.6	1.6	175.19		10		No ASA	2006-01-06	6.4	86	BDG	45	120	6	#NULL!	#NULL!	#NULL!
Male		2023-07-04	90	0	No	No	No	No	No	Yes	No	No	No	No	No	2009-06-09	39	No	3120	No	87	Yes	Yes	No	No	Yes	No	Pulmonary obstruction	2009-08-14	0.22	7	6	6	2.16	302.64	23	8	2.06	No ASA	2009-10-09	3.8	83	BDG	109	210	49	20	312	96
Male		2023-09-21	98	0	No	No	No	No	No	Yes	No	No	Yes	No	No	2009-06-24	40	No	3290	No	58	Yes	Yes	No	No	Yes	No	Pulmonary obstruction	2009-08-28	0.35	10	8.9	8	2.36	407.62		10	1.28	No ASA	2010-02-08	7.5	65	BDG	0	60	0	12	147	0
Male		2023-02-28	93	0	No	No	Yes	Yes	No	No	Yes	No	No	No	No	2012-08-15	36	Yes	2200	Yes	80	No	No	No	No	Yes	No	Pulmonary obstruction	2013-03-06	0.36	7.3	8.5	6.6	2.6	272.42	18	12	2.49	No ASA	2013-11-29	9.4	85	BDG	46	120	0	14	9	0
Female		2023-07-18	98	0	No	No	No	No	No	Yes	Yes	No	No	No	No	2013-09-18	40	No	2690	No	96	No	No	No	No	Yes	No	Systemic obstruction	2014-03-19	0.323	11.66	7.58	7.91	2.43	454.01	20	12	1.53	No ASA	2014-11-04	7.4	77	BDG	62	160	0	17	28	0
Female		2022-10-20	97	0	No	No	No	No	No	Yes	No	No	No	No	Yes	2005-11-15	40	No	3200	No	97	Yes	No	Yes	No	Yes	No	Pulmonary obstruction	2006-02-27	0.74	9.9	9.1	10.7	1.77	191.6	12	10		No ASA	2006-08-04	18.9	90	Bilateral BDG	96	190	31	12	65	0
Male		2022-12-20	97	0	No	No	No	Yes	Yes	Yes	No	No	Yes	No	No	2006-10-16	32	Yes	2740	No	69	Yes	No	No	No	Yes	No	Pulmonary obstruction	2006-09-07	0.44	11.6	11.8	11.2	2	488.73	5	7		No ASA	2007-01-26	9.6	75	Bilateral BDG	58	115	0	16	40	0
Female		2023-08-29	78	0	No	No	No	No	No	Yes	No	No	No	Yes	No	2003-09-02			2800	No	35	No	No	No	No	Yes	No	Pulmonary obstruction	2009-03-27	0.7	9.53	7.02	12.7	1.3	158.01	13	11	0.76	ASA	2009-09-11	17	86	BDG	42	120	0	16	46	0
Female	2010-01-05	2010-01-05	85	0	Yes	No	No	No	No	No	No	No	Yes	No	Yes	2004-08-16	39	No	2410	Yes	87	Yes	No	No	No	Yes	No	Pulmonary obstruction	2005-10-14	0.41	8.4	10.2	8.9	2	334.46	15	8	2.4	No ASA	2006-04-17	9.9	82	BDG	35	150	0	9	130	12
Female		2019-12-24	71	0	No	No	No	Yes	No	Yes	No	No	No	No	No	2006-11-10			3200	No	68	No	No	No	No	Yes	No	Pulmonary obstruction	2011-09-16	0.84	12.6	11.6	13	1.86	275.73	14	16	2.69	ASA	2012-02-17	22	85	BDG	35	100	0	6	32	0
Female		2020-02-04	72	0	No	No	No	Yes	No	No	Yes	No	Yes	No	No	2007-11-26	40	No	2800	No	98	No	No	No	No	Yes	No	Systemic obstruction	2010-04-30	0.57	12.7	10.57	7.99	2.91	163.62	20	19	1.09	No ASA	2010-10-13	12.5	99	Bilateral BDG	127	240	52	29	479	216
Male	2020-07-08	2020-07-08	71	0	No	No	No	No	No	No	Yes	No	No	Yes	No	2010-08-04					72	No	No	No	No	Yes	No	Pulmonary obstruction	2011-06-22	1.46	20.3	11.41	19	1.65	292.13	18	15	1.11	ASA	2013-02-28	47.3	70	BDG	62	100	0	19	16	0
Male		2023-07-18	86	0	No	No	No	Yes	No	Yes	No	No	Yes	No	No	2013-07-17	37	No	2880	No	95	No	No	No	No	Yes	No	Excessive pulmonary blood flow	2014-02-27	0.322	9.03	9.64	5.02	3.7	425.55	26	13	1.37	No ASA	2014-10-28	8.6	90	BDG	50	120	0	18	76	0
Male		2021-03-23	79	0	No	No	No	Yes	No	Yes	No	No	Yes	No	No	2014-02-11	32	Yes	2800	No	78	Yes	Yes	No	No	Yes	Yes	Pulmonary obstruction	2014-05-22	0.69	10.27	9.2	9.3	2.09	216.4	23	17	2.76	No ASA	2014-12-26	17.5	76	BDG	0	150	0	11	185	0
Male		2023-08-08	84	0	Yes	No	No	Yes	No	Yes	No	No	Yes	No	No	2014-02-19	37	No	2980	No	84	No	No	No	No	Yes	No	Pulmonary obstruction	2014-05-06	0.353	12.5	10	6.6	3.4	542.48	20	10	1.67	No ASA	2015-07-29	10.2	91	Bilateral BDG	0	195	0	16	474	160
Male		2021-04-01	72	0	No	No	No	Yes	No	Yes	No	No	Yes	No	No	2014-11-04	40	No	2200	Yes	62	No	No	No	No	Yes	No	Pulmonary obstruction	2014-11-19	0.666	8	9	14	1.2	171	18	17	3.07	No ASA	2014-11-25	13.8	70	BDG	53	105	0	20	26	0
Male		2019-01-15	86	0	No	No	No	No	No	Yes	No	No	Yes	Yes	No	2016-01-30	40	No	2600	No	93	No	No	No	No	Yes	No	Pulmonary obstruction	2017-11-27	0	11	14	7	4	537	23	16	1.01	No ASA	2018-01-09	9.7	90	BDG	106	180	24	11	24	24
Male		2022-03-23	89	0	No	No	No	Yes	No	Yes	Yes	No	Yes	No	No	2016-05-24	40	No	3170	No	75	No	No	No	No	Yes	No	Systemic obstruction	2016-12-28	0.42	8.7	9.5	7.56	2.4	313.08	27	15	1.69	No ASA	2017-03-08	7.7	88	BDG	68	200	0	17	246	202
Male		2023-11-30	85	0	No	No	No	No	No	Yes	No	No	No	No	Yes	2017-04-04	36	Yes	2525	No	91	No	No	No	No	Yes	No	Pulmonary obstruction	2017-12-14	0.35	9.5	10.44	6.8	2.9	442.05	18	12	1.54	No ASA	2018-02-05	7.5	85	BDG	64	150	0	11	71	4
Male		2023-11-29	85	0	No	No	No	Yes	No	Yes	No	No	Yes	No	No	2017-06-11	38	No	3100	No	85	Yes	Yes	No	No	Yes	No	Systemic obstruction	2018-01-03	0.37	8.24	5.91	5.59	2.53	219.42	17	12	1.26	No ASA	2018-12-28	8.24	88	BDG	50	120	0	7	22	0
Male		2023-09-19	83	0	Yes	Yes	No	Yes	No	Yes	No	Yes	Yes	No	Yes	2018-01-22	37	No	3825	No	70	Yes	Yes	No	No	Yes	No	Pulmonary obstruction	2018-08-16	0.379	7	7.33	6.81	2.09	212.88	22	13	3.84	No ASA	2019-06-25	12.4	80	BDG	207	260	0	14	76	24
Female		2023-07-25	79	0	No	No	No	Yes	No	Yes	No	No	Yes	No	No	2018-07-20	40	No	2810	No	85	Yes	No	No	No	Yes	No	Pulmonary obstruction	2018-09-27	0.386	7	8.47	8.34	1.9	245.67	15	10	1.6	No ASA	2019-01-14	10	82	BDG	115	180	76	#NULL!	#NULL!	#NULL!
Male		2023-04-25	85	0	No	No	No	Yes	Yes	Yes	No	No	Yes	No	No	2018-10-01	39	No	4090	No	85	Yes	Yes	No	No	Yes	No	Pulmonary obstruction	2019-09-25	0.49	6.4	7.2	8	1.7	149.22	15	12	0.65	ASA	2019-12-19	11.7	73	Bilateral BDG	223	335	0	14	54	20
Male		2023-07-18	96	0	Yes	No	No	No	No	Yes	No	Yes	Yes	No	No	2019-09-17	36	Yes	2385	Yes	85	No	No	No	No	Yes	Yes	Pulmonary obstruction	2020-01-15	0.36	11.7	7.3	7.5	2.5	409.78	19	7	3.95	No ASA	2020-06-04	8.8	86	BDG	55	125	0	24	46	24
Female	2011-08-28	2011-08-28	89	0	No	No	No	No	No	Yes	No	No	No	Yes	No	2006-08-07	40	No	2700	No	89	Yes	No	No	No	Yes	No	Pulmonary obstruction	2008-10-10	0.54	7.99	6.68	8.24	1.78	156.81	18	12	1.32	ASA	2009-03-09	13.2	85	BDG	64	150	0	19	119	48
[truncated: 46 more columns]
